# Supplementary material
Source: PubMed Central journal article supplement (PMC8961462)

Variable Importance for Model 2: ASQ+EHR

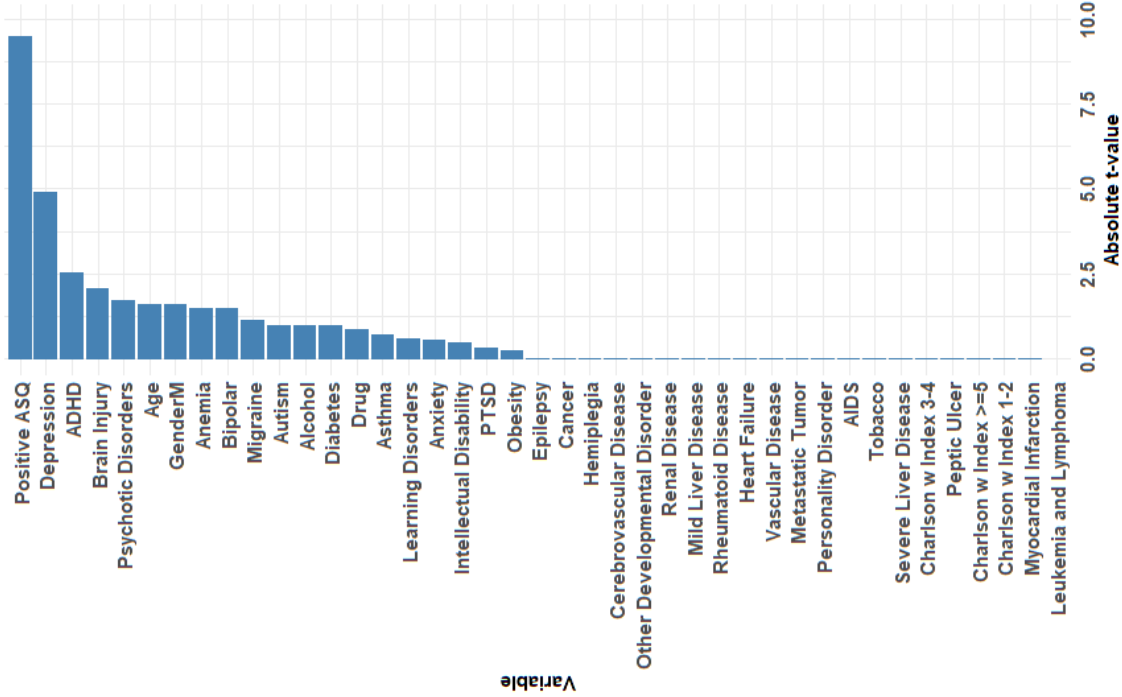

Variable Importance for Model 3: EHR

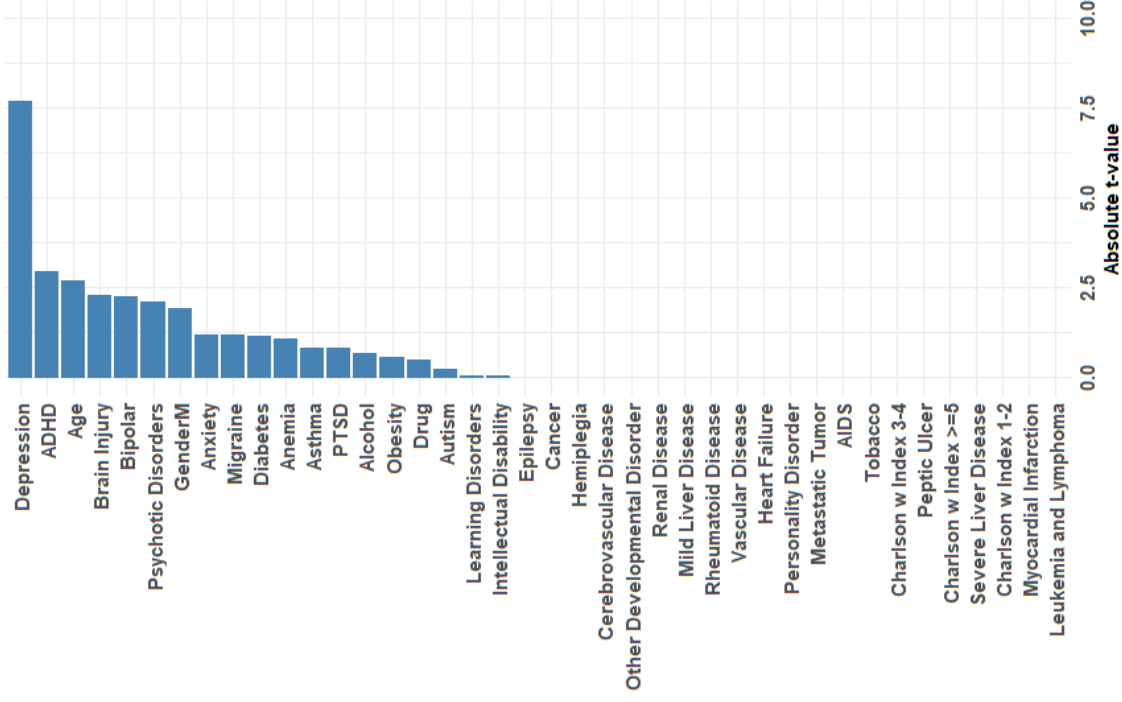

Variable Importance for Model 4: EHR+ASQ4

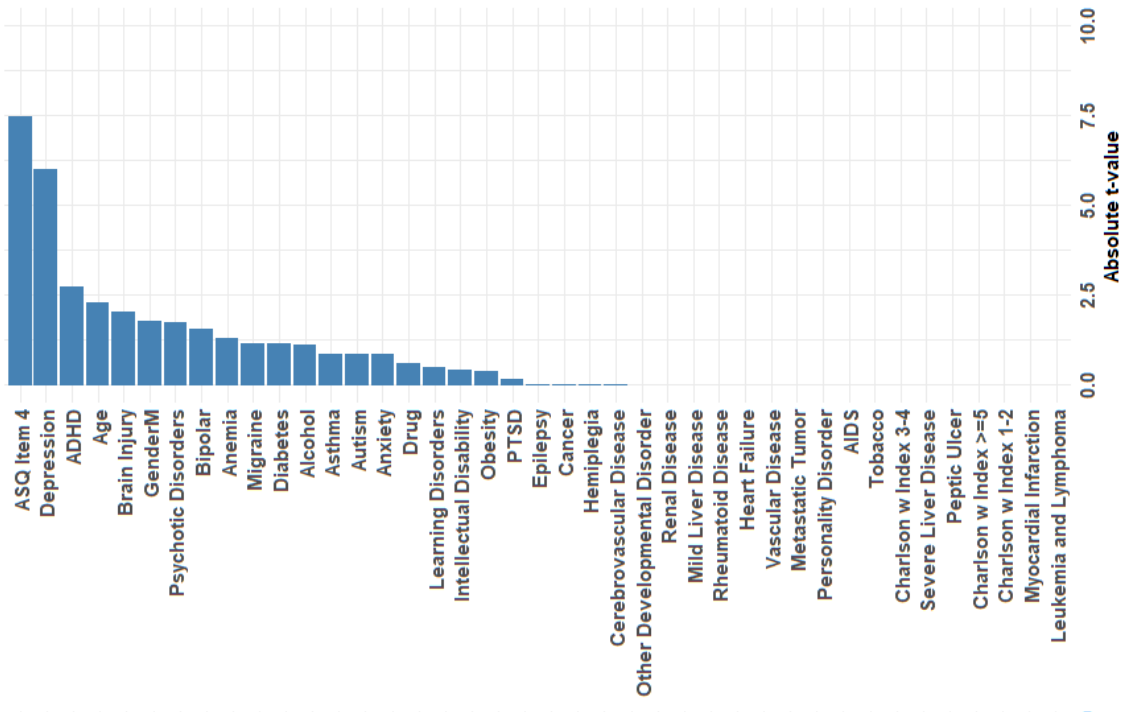

Supplement: NIHMS1785345-supplement-sup_figure1_var_list.pdf [file NIHMS1785345-supplement-sup_figure1_var_list.pdf]
